# Supplementary material
Source: PubMed Central journal article supplement (PMC5758435)
Supplement: NIHMS893666-supplement-supplement_1.pdf [file NIHMS893666-supplement-supplement_1.pdf]

## 1 **Supplementary Material**

2

## 3 **Supplementary Methods**

4

### 5 **Human samples**

6 Serum samples of 7 patients (P2, P5, P7, P8, P11-13) from a previously published  
7 cohort of 15 patients<sup>E21-23,33</sup> and 4 additional patients (P19-22), who completed a 3-year  
8 subcutaneous AIT with birch pollen extract containing alum (ALK-depot SQ from ALK-  
9 Abelló, Hørsholm, Denmark), were investigated. Prior to treatment, all 11 patients showed  
10 allergic symptoms to birch pollen (rhinoconjunctival symptoms +/- asthma) and were  
11 characterized by a positive skin prick test with birch pollen extract (ALK Prick SQ from  
12 ALK-Abelló), total serum IgE concentrations and serum IgE reactivity against both birch  
13 pollen extract and Bet v 1 (kUA/l; Phadia ImmunoCAP System from Thermo Fisher, Uppsala,  
14 Sweden) (**Fig 2**, and **Fig E2** and **E4**). The studies were approved by the Ethics Committee of  
15 the Medical Faculty of Philipps University, Marburg, Germany; all patients provided written  
16 informed consent to participate in the trials. Additionally, serum from untreated patients with  
17 moderate to severe birch pollen allergic symptoms was collected during (n=8) or outside  
18 (n=8) the birch pollen season (**Fig E4**) after patients provided written informed consent  
19 (Ethics Committee of the Medical Faculty of the University of Lübeck; Approval Number:  
20 12-042). Bet v 1-specific IgE, IgG, IgG1 and IgG4 titers of untreated (season; n=8; no season:  
21 n=6) and all treated patients and the Fc glycosylation profiles of purified Bet v 1-specific IgG  
22 Abs from 10 out of the 16 untreated patients during (n=5) or outside (n=5) the birch pollen  
23 season and 5 randomly selected treated patients (P2, P11, P13, P19, P21) at different time  
24 points (**Fig 2** and **Fig E2** and **E4**) were analyzed.

25

## 26 **Mice**

27 All mice were bred and maintained in the specific pathogen-free (SPF) facilities at the  
28 University of Lübeck or the Cincinnati Children's Research Foundation and all experiments  
29 were done with the approval of and in accordance with regulatory guidelines and ethical  
30 standards set by the University of Lübeck and the Ministry of Schleswig-Holstein, Germany  
31 or the Institutional Animal Care and Use Committee of Cincinnati Children's Hospital  
32 Medical Center, USA, respectively. Balb/c and C57BL/6 *wild type (wt)* mice were purchased  
33 from Charles River Laboratories. *Fcgr2b*<sup>-/-</sup> mice had been backcrossed for a minimum of 10  
34 generations to the Balb/c or C57BL/6 background<sup>E34</sup>. Only 8-12-week-old female mice were  
35 analyzed in the experiments. Mice were randomly assigned to groups, but a specific  
36 randomization program was not used.

37

## 38 **Reagents**

39 TNP-coupled BSA (TNP-BSA), BSA and TNP-OVA were purchased from Biosearch  
40 Technologies (Novato, CA, USA) and OVA from Sigma-Aldrich (St. Louis, MO, USA).  
41 Incomplete Freund's adjuvant (IFA) was purchased from Sigma-Aldrich. Enriched CFA  
42 (eCFA) was prepared by adding heat-killed *M. tuberculosis* H37 RA (DIFCO Laboratories) to  
43 IFA (5 mg *M. tuberculosis*/ml)<sup>E35</sup>. Alum was purchased from Thermo-Scientific (Waltham,  
44 MA, USA), MPLA derived from *S. minnesota* R595 (MPLA-SM) from Invivogen (# vac-  
45 mpla; San Diego, CA, USA) and IVIg (Intracet; pooled serum IgG of healthy donors used in  
46 high concentrations (2 mg/kg) to treat patients with acute flares of autoimmune disease) from  
47 Biotest (Boca Raton, FL, USA).

48

## 49 **Monoclonal Abs**

50 The IgE anti-TNP (clone IgEL a2; ATCC-TIB-142)<sup>E36</sup> and IgG1 anti-TNP (clone  
51 H5)<sup>E35,37</sup> hybridoma cells and the murine IgG1, IgG2a and IgG2b anti-TNP hybridoma switch

52 variants (sv)<sup>E20</sup> were authenticated by antigen-specific IgG subclass ELISA and grown in  
53 0.03% Primatone RL/UF (175#DR from Kerry Biosciences, Tralee, Ireland) for Ab  
54 production. The IgG hybridoma cell lines had been tested negative for mycoplasma  
55 contamination. IgG mAbs were purified from cell culture medium with Protein G–Sepharose  
56 (GE Healthcare, Little Chalfont, UK) and IgE anti-TNP mAbs were purified using TNP-BSA  
57 coupled to CNBr-activated Sepharose 4B (GE Healthcare) prepared in our laboratory. Ab  
58 integrity was verified by SDS-PAGE, and anti-TNP reactivity was tested using ELISA. IgG  
59 Fc glycan structures were analyzed by HPLC.

60

#### 61 **Immunization and purification of OVA-specific IgG Abs.**

62 8-10-week-old C57BL/6 mice were immunized intraperitoneally (i.p.) as indicated in  
63 **Fig 2, F, and Fig E3**. Serum samples were collected on day 14 and pooled OVA-specific  
64 serum IgG Abs were purified using OVA coupled to CNBr-activated Sepharose 4B (GE  
65 Healthcare) prepared in our laboratory. Enrichment of OVA-specific IgG Abs was verified  
66 using ELISA. IgG subclass distribution and Fc glycan structures were analyzed by  
67 glycopeptide analysis. The potential of the pooled and purified IgG anti-OVA Abs from  
68 distinct groups was analyzed in the IgG-mediated anaphylaxis model.

69

#### 70 **Recombinant Bet v 1**

71 Recombinant Bet v 1-A (Bet v 1.0101; [www.allergen.org](http://www.allergen.org)) was expressed in *E. coli*  
72 BL21 (Merck Millipore, Darmstadt, Germany) cells in the form of inclusion bodies (IBs). IBs  
73 were solubilized using 6 M guanidinium hydrochloride and Bet v 1 was subsequently refolded  
74 by rapid dilution in sodium phosphate buffer pH 7.2. Folded Bet v 1 was purified by  
75 hydrophobic interaction chromatography (phenyl Sepharose 6FF high sub from GE  
76 Healthcare) and size exclusion chromatography (Superdex 75 from GE Healthcare) and  
77 finally formulated in 18 mM sodium phosphate, 135 mM sodium chloride and 10% glycerol.

78

### 79 **Purification of Bet v 1-specific IgG Abs**

80 Human serum IgG was purified with Protein G–Sepharose (GE Healthcare). Bet v 1-  
81 specific IgG was enriched using Bet v 1 coupled to cyanogen bromide-activated Sepharose 4B  
82 (GE Healthcare) prepared in our laboratory (**Fig E2**). The enrichment of Bet v 1-specific IgG  
83 and exclusion of tetanus toxin-specific IgG was verified using ELISA (**Fig E2**). IgG Fc  
84 glycan structures were analyzed by HPLC.

85

### 86 **TNP- and OVA-reactive ELISA**

87 ELISA plates were coated with 10 µg/ml of TNP-BSA or OVA +/- the indicated  
88 concentrations of BSA to measure the reactivity or affinity of the indicated IgG subclass anti-  
89 TNP mAbs or (purified) serum IgG anti-OVA Abs. Bound Abs were detected with  
90 horseradish peroxidase (HRP)-coupled polyclonal goat anti-mouse IgG-, IgG1-, IgG2c- (the  
91 isoform of IgG2a in C57BL/6 mice), IgG2b- or IgE-specific Abs purchased from Bethyl  
92 Laboratories (Montgomery, TX, USA). After incubation with the 3,3',5,5'-  
93 tetramethylbenzidine (TMB) substrate (BD Biosciences San Diego, CA, USA) or in **Fig E1**  
94 with Femto Substrat (Thermo Fisher Scientific), optical density (OD) was measured at 450  
95 nm or 425 nm, respectively.

96

### 97 **Bet v 1- and tetanus toxin-reactive ELISA**

98 ELISA plates were coated with 10 µg/ml of Bet v 1 or 2.5 Lf/ml tetanus toxin  
99 (NIBSC, UK) to measure Bet v 1- or tetanus toxin-specific IgE, IgG, IgG1 or IgG4 levels.  
100 Unless indicated otherwise, plates were incubated with 1/100 diluted serum or plasma, and the  
101 bound Abs were detected with anti-human IgG (clone HP-6017, mouse IgG2a) or IgG1 (clone  
102 HP-6001, mouse IgG2b) and horseradish peroxidase-conjugated polyclonal goat anti-mouse  
103 IgG2a or anti-mouse IgG2b secondary Abs, respectively, horseradish peroxidase-conjugated

104 anti-human IgG4 (HP-6025, mouse IgG1) or horseradish peroxidase-conjugated polyclonal  
105 anti-human IgE (all antibodies from Bethyl Laboratories).

106

#### 107 ***In vitro* de-sialylation and/or de-galactosylation of IgG Abs**

108 The purified (native) IgG Abs were de-sialylated (de-sial) with *sialidase A*  
109 (#GK80040 from ProZyme, Hayward, CA, USA) or additionally de-galactosylated (de-gal)  
110 with  $\beta(1-4)$ -galactosidase (*Streptococcus pneumoniae*) (#GKX-5014 from ProZyme). Anti-  
111 TNP and anti-Bet v 1 reactivities of differently glycosylated Abs were analyzed by ELISA.  
112 IgG Fc N-glycosylation was analyzed by HPLC.

113

#### 114 ***In vitro* galactosylation and/or sialylation of IgG Abs**

115 *In vitro* galactosylation and sialylation of purified IgG Abs was performed in a 2-step  
116 procedure, as previously described<sup>E16,35,38</sup>. Briefly, purified (native) Abs were galactosylated  
117 (gal) with human  $\beta 1,4$ -galactosyltransferase and UDP-galactose or subsequently additionally  
118 sialylated (sial) with human  $\alpha 2,6$ -sialyltransferase and CMP-sialic acid (the substrates and  
119 transferases were purchased from Calbiochem (Nottingham, UK) or Roche (Basel,  
120 Switzerland) or the  $\alpha 2,6$ -sialyltransferase was produced as described<sup>E39,40</sup>. The anti-TNP  
121 reactivity of differently glycosylated Abs was tested using ELISA. IgG Fc N-glycosylation  
122 was analyzed by HPLC.

123

#### 124 **Glycan analysis of purified IgG Abs via HPLC**

125 N-glycans were isolated from purified IgG samples by hydrolysis with recombinant  
126 *endoglycosidase S (EndoS)* from *Streptococcus pyogenes*<sup>E35,38,41</sup>. *EndoS* cleaves the Fc N-  
127 glycans of IgG Abs at the chitobiose core between the first and second GlcNAc (**Fig 1, A**, and  
128 **Fig E1**). The resulting N-glycans were purified by solid phase extraction using home-made  
129 Carbograph<sup>TM</sup> graphitized carbon columns (Fisher Scientific, Hampton, NH, USA)<sup>E42</sup> and

130 labeled with anthranilamide (2-AB; Sigma-Aldrich), as previously described<sup>E43</sup>. The  
131 hydrophilic interaction liquid chromatography (HILIC)-HPLC with the labeled glycans was  
132 performed on a Dionex Ultimate 3000 (Thermo Fischer Scientific, Waltham, MA, USA)  
133 using an Xbridge XP BEH Glycan column (2.5  $\mu$ m, 100 x 4.6 mm i.d.) (Waters Corp.,  
134 Milford, MA, USA). Peak identity was confirmed by analyzing the collected peak fractions  
135 using MALDI-TOF MS as described<sup>E35,38</sup>. Glycans with human or murine sialic acids (human  
136 N-acetylneuraminic acid [Neu5Ac] or murine N-glycolylneuraminic acid [Neu5Gc]) had  
137 different retention times. Based on the terminal sugar moiety, the peaks were assigned to one  
138 of the following nine groups: G0 + bisecting GlcNAc, G0 - bisecting GlcNAc, G1 + bisecting  
139 GlcNAc, G1 - bisecting GlcNAc, G2 + bisecting GlcNAc, G2 - bisecting GlcNAc, G1S1,  
140 G2S1 and G2S2. Peaks containing both sialic acid and bisecting GlcNAc were not detected.  
141 The calculated proportions of the bisecting GlcNAc versions of G0, G1 and G2 were added to  
142 the percentages of the G0, G1 and G2 versions without bisecting GlcNAc, respectively, to  
143 present here six groups totaling 100%: G0, G1, G2, G1S1, G2S1 and G2S2 (**Figs 1 and 2**, and  
144 **Figs E1-3**). Mouse IgG Abs rarely have a bisecting GlcNAc, whereas 10-15% of human IgG  
145 Abs have a bisecting GlcNAc. Because more Fc glycans of total serum IgG from untreated  
146 C57BL/6 mice are sialylated than pooled serum IgG from healthy human donors (IVIg), the  
147 percentages of sialylation of murine and human IgG Abs cannot directly be compared.

148

#### 149 **IgG Fc subclass glycopeptide analysis**

150 In contrast to only small differences in Fc glycosylation pattern between human IgG  
151 subclasses in the same sample<sup>E30,31</sup>, the Fc glycosylation pattern of murine IgG subclass Abs  
152 in the same sample highly differ (de Haan et al, 2017). Accordingly, IgG Fc subclass  
153 glycopeptides were analyzed as described previously<sup>E44</sup>. In short, OVA-specific IgG Abs  
154 were cleaved with trypsin, and IgG1 and IgG2 (IgG2b and IgG2c; both cannot be  
155 distinguished because of the comparable peptide sequence) Fc-glycopeptides were analyzed

156 by nano-liquid chromatography-mass spectrometry (LC-MS). Glycopeptide signals were  
157 assigned and quantified<sup>E32</sup>, and IgG1 versus IgG2 ratios and their summarized G0, G1, G2,  
158 G1S1, G2S1 and G2S2 forms were calculated as described above. Glycans without fucose or  
159 with bisecting GlcNAc were hardly detected.

160

### 161 **Experimental passive IgE-mediated systemic anaphylaxis.**

162 On day 0, female mice were primed i.v. with 10 µg of IgE anti-TNP (clone IgEL a2;  
163 ATCC-TIB-142<sup>E36</sup>). 22.5 h later, mice were treated with various amounts of IgG subclass  
164 anti-TNP mAbs and challenged i.v. with 1 µg of TNP-OVA 1.5 h later. Changes in the body  
165 core/rectal temperature were measured to assess the severity of systemic anaphylaxis  
166 (Physitemp BAT-12R thermometer from Science Products GmbH, Hofheim, Germany).

167

### 168 **Experimental passive IgG-mediated systemic anaphylaxis.**

169 200 µg of IgG subclass anti-TNP or 100 µg of purified OVA-specific IgG Abs were  
170 injected i.v. into female C57BL/6 mice. 24 h later, the mice were challenged i.v. with 20 µg  
171 of TNP-OVA. The severity of anaphylaxis was measured by determining the changes in the  
172 body core/rectal temperature.

173

### 174 **α-SignR1 treatment**

175 The α-SignR1 (clone 22D1) mAb was purchased from BioXCell (West Lebanon, NH,  
176 USA). 100 µg of this Ab were i.v. injected 1 h before IgG subclass anti-TNP Ab injection to  
177 induce SignR1 internalisation<sup>E17</sup>.

178

### 179 **Human neutrophil activation assay**

180 Human neutrophils were isolated from heparinized peripheral blood from healthy adult  
181 donors as previously described<sup>E45</sup>. To generate plate-bound, immobilized immune complexes,

182 50 µg/ml of Bet v 1 in 0.05 mM carbonate/bicarbonate buffer (pH 9.6) was coated on  
183 Lumitrac 600 96-well plates (Greiner Bio-one, Frickenhausen, Germany) for 1 h, followed by  
184 an 18 h incubation with de-sialylated or native purified serum IgG (200 µg/200µl/well).  
185 Freshly isolated neutrophils in chemiluminescence medium (RPMI medium without phenol  
186 red and sodium bicarbonate containing 20 nM HEPES and 0.06 mM Luminol;  $2 \times 10^6$   
187 cells/ml) were seeded in the plates with the immobilized immune complexes ( $2 \times 10^5$   
188 cells/well). The sum of the intra- and extracellular reactive oxygen species (ROS), a sign of  
189 neutrophil activation, was measured (duplicate measurements) by luminol-amplified  
190 chemiluminescence for 1.5 h at 37°C using FluoStar Omega (BMG Labtech, Ortenberg,  
191 Germany).

192

### 193 **Statistical analysis**

194 The analysis of the OVA injection data and ROS data (area under the curve, AUC)  
195 were performed using Student's t-test. The body core/rectal temperature data (AUC) were  
196 analyzed using one-way ANOVA. Longitudinal analyses of the Bet v 1-specific antibody  
197 titers, prick tests and clinical scores were performed using the Wilcoxon signed-rank test. All  
198 experiments were not blinded. If not stated otherwise, data were expressed as mean values  $\pm$   
199 standard error of the mean (SEM). In all experiments normal distribution was assumed. \*P <  
200 0.05, \*\*P < 0.01 and \*\*\*P < 0.001.

201



## 202 **Supplementary References**

203

204 E1. Santos AF, James LK, Bahnson HT, Shamji MH, Couto-Francisco NC, Islam S, et al.  
205 IgG4 inhibits peanut-induced basophil and mast cell activation in peanut-tolerant  
206 children sensitized to peanut major allergens. *J Allergy Clin Immunol* 2015;  
207 135:1249-56.

208

209 E2. Shade KT, Platzer B, Washburn N, Mani V, Bartsch YC, Conroy M, et al. A single glycan  
210 on IgE is indispensable for initiation of anaphylaxis. *J Exp Med* 2015; 212:457-67.

211

212 E3. Wawrzyniak P, Akdis CA, Finkelman FD, Rothenberg ME. Advances and highlights in  
213 mechanisms of allergic disease in 2015. *J Allergy Clin Immunol* 2016; 137:1681-96.

214

215 E4. Zhu D, Kepley CL, Zhang M, Zhang K, Saxon A. A novel human immunoglobulin Fc  
216 gamma Fc epsilon bifunctional fusion protein inhibits Fc epsilon RI-mediated  
217 degranulation. *Nat Med* 2002; 8:518-21.

218

219 E5. Burton OT, Logsdon SL, Zhou JS, Medina-Tamayo J, Abdel-Gadir A, Noval Rivas M, et  
220 al. Oral immunotherapy induces IgG antibodies that act through FcγRIIb to suppress  
221 IgE-mediated hypersensitivity. *J Allergy Clin Immunol* 2014; 134:1310-7.e6.

222

223 E6. Weiss ME, Nyhan D, Peng ZK, Horrow JC, Lowenstein E, Hirshman C, et al. Association  
224 of protamine IgE and IgG antibodies with life-threatening reactions to intravenous  
225 protamine. *N Engl J Med* 1989; 320:886-92.

226

- 227 E7. Hazenbos WL, Gessner JE, Hofhuis FM, Kuipers H, Meyer D, Heijnen IA, et al. Impaired  
228 IgG-dependent anaphylaxis and Arthus reaction in Fc gamma RIII (CD16) deficient  
229 mice. *Immunity* 1996; 5:181-8.  
230
- 231 E8. Miyajima I, Dombrowicz D, Martin TR, Ravetch JV, Kinet JP, Galli SJ. Systemic  
232 anaphylaxis in the mouse can be mediated largely through IgG1 and Fc gammaRIII.  
233 Assessment of the cardiopulmonary changes, mast cell degranulation, and death  
234 associated with active or IgE- or IgG1-dependent passive anaphylaxis. *J Clin Invest*  
235 1997; 99:901-14.  
236
- 237 E9. Khodoun MV, Strait R, Armstrong L, Yanase N, Finkelman FD. Identification of markers  
238 that distinguish IgE- from IgG-mediated anaphylaxis. *Proc Natl Acad Sci U S A* 2011;  
239 108:12413-8.  
240
- 241 E10. Quakkelaar ED, Fransen MF, van Maren WW, Vaneman J, Loof NM, van Heiningen  
242 SH, et al. IgG-mediated anaphylaxis to a synthetic long peptide vaccine containing a B  
243 cell epitope can be avoided by slow-release formulation. *J Immunol* 2014; 192:5813-  
244 20.  
245
- 246 E11. Bruhns P, Jönsson F. Mouse and human FcR effector functions. *Immunol Rev* 2015;  
247 268:25-51.  
248
- 249 E12. Gillis CM, Jönsson F, Mancardi DA, Tu N, Beutier H, Van Rooijen N, et al.  
250 Mechanisms of anaphylaxis in human low-affinity IgG receptor locus knock-in mice. *J*  
251 *Allergy Clin Immunol* 2017; 139:1253-65.e14.  
252

- 253 E13. Vidarsson G, Dekkers G, Rispen T. IgG subclasses and allotypes: from structure to  
254 effector functions. *Front Immunol* 2014; 5:520.  
255
- 256 E14. Scherer HU, van der Woude D, Ioan-Facsinay A, el Bannoudi H, Trouw LA, Wang J, et  
257 al. Glycan profiling of anti-citrullinated protein antibodies isolated from human serum  
258 and synovial fluid. *Arthritis Rheum* 2010; 62:1620-9.  
259
- 260 E15. Ohmi Y, Ise W, Harazono A, Takakura D, Fukuyama H, Baba Y, et al. Sialylation  
261 converts arthritogenic IgG into inhibitors of collagen-induced arthritis. *Nat Commun*  
262 2016; 7:11205.  
263
- 264 E16. Kaneko Y, Nimmerjahn F, Ravetch JV. Anti-inflammatory activity of immunoglobulin  
265 G resulting from Fc sialylation. *Science* 2006; 313:670-3.  
266
- 267 E17. Anthony RM, Wermeling F, Karlsson MC, Ravetch JV. Identification of a receptor  
268 required for the anti-inflammatory activity of IVIG. *Proc Natl Acad Sci U S A* 2008;  
269 105:19571-8.  
270
- 271 E18. Anthony RM, Kobayashi T, Wermeling F, Ravetch JV. Intravenous gammaglobulin  
272 suppresses inflammation through a novel T(H)2 pathway. *Nature* 2011; 475:110-3.  
273
- 274 E19. Karsten CM, Pandey MK, Figge J, Kilchenstein R, Taylor PR, Rosas M, et al. Anti-  
275 inflammatory activity of IgG1 mediated by Fc galactosylation and association of Fc  
276 gamma RIIB and dectin-1. *Nature Medicine* 2012; 18:1401-6.  
277

- 278 E20. Strait RT, Posgai MT, Mahler A, Barasa N, Jacob CO, Köhl J, et al. IgG1 protects  
279 against renal disease in a mouse model of cryoglobulinaemia. *Nature* 2015; 517:501-4.  
280
- 281 E21. Möbs C, Slotosch C, Löffler H, Jakob T, Hertl M, Pfützner W. Birch pollen  
282 immunotherapy leads to differential induction of regulatory T cells and delayed helper  
283 T cell immune deviation. *J Immunol* 2010; 184:2194-203.  
284
- 285 E22. Gepp B, Lengger N, Möbs C, Pfützner W, Radauer C, Bohle B, et al. Monitoring the  
286 epitope recognition profiles of IgE, IgG1, and IgG4 during birch pollen  
287 immunotherapy. *J Allergy Clin Immunol* 2016; 137:1600-3.e1.  
288
- 289 E23. Subbarayal B, Schiller D, Möbs C, Pfützner W, Jahn-Schmid B, Gepp B, et al. The  
290 diversity of Bet v 1-specific IgG4 antibodies remains mostly constant during the  
291 course of birch pollen immunotherapy. *J Allergy Clin Immunol* 2015; 136:1680-2.e3.  
292
- 293 E24. Aalberse RC, van der Gaag R, van Leeuwen J. Serologic aspects of IgG4 antibodies. I.  
294 Prolonged immunization results in an IgG4-restricted response. *J Immunol* 1983;  
295 130:722-6.  
296
- 297 E25. Larché M, Akdis CA, Valenta R. Immunological mechanisms of allergen-specific  
298 immunotherapy. *Nat Rev Immunol* 2006; 6:761-71.  
299
- 300 E26. Pfaar O, Cazan D, Klimek L, Larenas-Linnemann D, Calderon MA. Adjuvants for  
301 immunotherapy. *Curr Opin Allergy Clin Immunol* 2012; 12:648-57.  
302

- 303 E27. Patel P, Holdich T, Fischer von Weikersthal-Drachenberg KJ, Huber B. Efficacy of a  
304 short course of specific immunotherapy in patients with allergic rhinoconjunctivitis to  
305 ragweed pollen. *J Allergy Clin Immunol* 2014; 133:121-9.e1-2.  
306
- 307 E28. Valenta R, Campana R, Focke-Tejkl M, Niederberger V. Vaccine development for  
308 allergen-specific immunotherapy based on recombinant allergens and synthetic  
309 allergen peptides: Lessons from the past and novel mechanisms of action for the  
310 future. *J Allergy Clin Immunol* 2016; 137:351-7.  
311
- 312 E29. Mahan AE, Jennewein MF, Suscovich T, Dionne K, Tedesco J, Chung AW, et al.  
313 Antigen-Specific Antibody Glycosylation Is Regulated via Vaccination. *PLoS Pathog*  
314 2016; 12:e1005456.  
315
- 316 E30. Bondt A, Selman MH, Deelder AM, Hazes JM, Willemsen SP, Wuhrer M, et al.  
317 Association between galactosylation of immunoglobulin G and improvement of  
318 rheumatoid arthritis during pregnancy is independent of sialylation. *J Proteome Res*  
319 2013; 12:4522-31.  
320
- 321 E31. Pezer M, Stambuk J, Perica M, Razdorov G, Banic I, Vuckovic F, et al. Effects of  
322 allergic diseases and age on the composition of serum IgG glycome in children. *Sci*  
323 *Rep* 2016; 6:33198.  
324
- 325 E32. de Haan N, Reiding KR, Krištić J, Ederveen ALH, Lauc G, Wuhrer M. The N-  
326 glycosylation of mouse IgG-Fc differs between IgG subclasses and strains. *Frontiers*  
327 *in Immunology* 2017; doi: 10.3389/fimmu.2017.00608.  
328

- 329 E33. Möbs C, Ipsen H, Mayer L, Slotosch C, Petersen A, Würtzen PA, et al. Birch pollen  
330 immunotherapy results in long-term loss of Bet v 1-specific TH2 responses, transient  
331 TR1 activation, and synthesis of IgE-blocking antibodies. *J Allergy Clin Immunol*  
332 2012; 130:1108-16.e6.
- 333
- 334 E34. Takai T, Ono M, Hikida M, Ohmori H, Ravetch JV. Augmented humoral and  
335 anaphylactic responses in Fc gamma RII-deficient mice. *Nature* 1996; 379:346-9.
- 336
- 337 E35. Hess C, Winkler A, Lorenz AK, Holecska V, Blanchard V, Eiglmeier S, et al. T cell-  
338 independent B cell activation induces immunosuppressive sialylated IgG antibodies. *J*  
339 *Clin Invest* 2013; 123:3788–96.
- 340
- 341 E36. Rudolph AK, Burrows PD, Wabl MR. Thirteen hybridomas secreting hapten-specific  
342 immunoglobulin E from mice with Iga or Igb heavy chain haplotype. *Eur J Immunol*  
343 1981; 11:527-9.
- 344
- 345 E37. Wernersson S, Karlsson MC, Dahlström J, Mattsson R, Verbeek JS, Heyman B. IgG-  
346 mediated enhancement of antibody responses is low in Fc receptor gamma chain-  
347 deficient mice and increased in Fc gamma RII-deficient mice. *J Immunol* 1999;  
348 163:618-22.
- 349
- 350 E38. Oefner CM, Winkler A, Hess C, Lorenz AK, Holecska V, Huxdorf M, et al. Tolerance  
351 induction with T cell-dependent protein antigens induces regulatory sialylated IgGs.  
352 *Journal of Allergy and Clinical Immunology* 2012; 129:1647-55.
- 353

- 354 E39. Barb AW, Meng L, Gao Z, Johnson RW, Moremen KW, Prestegard JH. NMR  
355 characterization of immunoglobulin G Fc glycan motion on enzymatic sialylation.  
356 Biochemistry 2012; 51:4618-26.  
357
- 358 E40. Meng L, Forouhar F, Thieker D, Gao Z, Ramiah A, Moniz H, et al. Enzymatic basis for  
359 N-glycan sialylation: structure of rat  $\alpha$ 2,6-sialyltransferase (ST6GAL1) reveals  
360 conserved and unique features for glycan sialylation. J Biol Chem 2013; 288:34680-  
361 98.  
362
- 363 E41. Collin M, Olsén A. Effect of SpeB and EndoS from Streptococcus pyogenes on human  
364 immunoglobulins. Infect Immun 2001; 69:7187-9.  
365
- 366 E42. Packer NH, Lawson MA, Jardine DR, Redmond JW. A general approach to desalting  
367 oligosaccharides released from glycoproteins. Glycoconj J 1998; 15:737-47.  
368
- 369 E43. Bigge JC, Patel TP, Bruce JA, Goulding PN, Charles SM, Parekh RB. Nonselective and  
370 efficient fluorescent labeling of glycans using 2-amino benzamide and anthranilic  
371 acid. Anal Biochem 1995; 230:229-38.  
372
- 373 E44. Sonneveld ME, Koelewijn J, de Haas M, Admiraal J, Plomp R, Koeleman CA, et al.  
374 Antigen specificity determines anti-red blood cell IgG-Fc alloantibody glycosylation  
375 and thereby severity of haemolytic disease of the fetus and newborn. Br J Haematol  
376 2017; 176:651-60.  
377

378 E45. Esmann L, Idel C, Sarkar A, Hellberg L, Behnen M, Möller S, et al. Phagocytosis of  
379 apoptotic cells by neutrophil granulocytes: diminished proinflammatory neutrophil  
380 functions in the presence of apoptotic cells. *J Immunol* 2010; 184:391-400.  
381



382 **Supplementary Figure legends**

383

384 **FIG E1. Generation, analysis and function of differently glycosylated IgG subclass Abs.**

385 **A**, The conserved IgG biantennary N-glycan at Asn297 can be modified by fucose (red),  
386 bisecting GlcNAc (light blue), galactose (G; yellow) and sialic acid (S; magenta). **B**,  
387 Exemplary HPLC glycan peaks of *in vitro* de-sialylated plus de-galactosylated (de-gal),  
388 galactosylated (gal) or galactosylated plus sialylated (sial) IgG2a anti-TNP mAbs (sv). **C**, Fc  
389 glycosylation profiles of the differently glycosylated murine IgG1, IgG2a and IgG2b anti-  
390 TNP switch variants (sv) that were used in the murine experiments; native=low-  
391 galactosylated (low-gal). **D-F**, IgG1 anti-TNP IgG1 affinity ELISA. **(D)** Experimental setup.  
392 ELISA plates were coated with TNP-BSA alone or with increasing amounts of BSA as  
393 indicated as ratios (TNP-BSA:BSA = 1:0, 1:10 or 1:1000). **(E)** Modification of the Fc-glycan  
394 of IgG1 anti-TNP mAbs (clone H5) did not change affinity. **(F)** IgG1 anti-TNP clone H5 has  
395 a higher affinity than the IgG1 anti-TNP switch variant (sv). One out of two independent  
396 ELISA experiments is shown in **E** and **F**. **G**, IgE-mediated anaphylaxis as described in **Fig 1**,  
397 **B** with 10 µg of low-gal IgG subclass anti-TNP mAbs (sv) in C57BL/6 wt or FcγRIIb-  
398 deficient mice. One of two independent experiments is shown. **H**, IgG-mediated anaphylaxis  
399 as described in **Fig 1**, **F** and **G** with low-gal (H5) or de-gal (sv) IgG subclass anti-TNP mAbs  
400 in wt mice; each IgG subclass Ab n=10-15. Symbols represent means. Pooled data from  
401 independent experiments with n=5/group/experiment.

402

403 **FIG E2. Further characterisation and Fc glycan analysis of Bet v 1-specific IgG Abs**

404 **from untreated and AIT-treated patients. A**, Prick-test results and **(B)** clinical scores of the  
405 11 AIT-treated patients (month; m). **C and D**, Serum titers of Bet v 1-specific **(C)** IgE and  
406 **(D)** IgG from untreated (season, n=8; no season, n=6 + 11 (AIT-treated, m0) and AIT-treated

407 (n=11) birch pollen allergic patients; black line: mean; gray: pollen season. One of two  
408 independent ELISAs is shown. The green data points depict the 5 AIT-treated patients who  
409 were selected for the glycan analysis in **Fig 2, B** and **C**, and **Fig E2, I** and **J**, while the red  
410 data points depict the 3 samples (patient 5 at m12 (5-12), 5-36 and 21-18) that were chosen  
411 for *in vitro* de-sialylation and neutrophil activation in **Fig 2, B-E** and **Fig E2, I, K** and **L**. **(E)**  
412 IgG4/IgG1 ratios (OD (IgG4) / OD (IgG1)) as calculated from the IgG1 and IgG4 ELISA data  
413 in **Fig 2, A, F**, Protocol for the purification and *EndoS* treatment of Bet v 1-specific serum  
414 IgG Abs. **G and H**, The amplification and purification of Bet v 1-specific IgG Abs was  
415 verified via **(G)** anti-Bet v 1 ELISA and **(H)** anti-tetanus-toxin ELISA to document the  
416 exclusion of IgG Abs that lack Bet v 1 specificity; here exemplified for patient P2 m36. **I and**  
417 **J**, Percentages of the different glycans (G0, G1, G2, G1S1, G2S1 and G2S2) from **(I)**  
418 summarized and **(J)** single human samples from purified Bet v 1-specific IgG Abs of  
419 untreated (season, n=5; no season, n=5 + 5 (AIT-treated, m0) and the 5 randomly selected  
420 AIT-treated patients and from IVIg and purified native and *in vitro* de-sialylated total serum  
421 IgG from patient samples 5-12, 5-36 and 21-18. **K and L**, Human neutrophil activation assay  
422 as described in **Fig 2, D** and **E**. **(K)** Experimental setup and **(L)** ROS production after  
423 activation with native or *in vitro* de-sialylated Bet v 1-specific IgG Abs of patient samples P5  
424 m12 and P21 m18; no IgG (black). One of at least two independent ROS assays is shown for  
425 each patient.

426

427 **FIG E3. Different adjuvants induce distinct IgG subclass distributions and IgG Fc**  
428 **glycosylation pattern.** **A**, Induction of differently glycosylated OVA-specific serum IgG Abs  
429 with distinct adjuvants (eCFA, alum or MPLA) as described in **Fig 2, F-J**. **B**, Design of the  
430 IgG anti-OVA Ab ELISA as used in **C**. **C**, Serum IgG (subclass) anti-OVA Ab distribution as  
431 analyzed by ELISA (n=5-10 for each group). Each ELISA represents one of two independent  
432 experiments. **D and E**, **(D)** IgG1 and IgG2 (IgG2b + IgG2c) or **(E)** total IgG Fc glycosylation

433 of all (G0, G1, G2, G1S1, G2S1 and G2S2) or only G0 forms of purified OVA-specific IgG  
434 Abs as determined by (D) glycopeptide or (E) total IgG glycan analysis.

435

436 **FIG E4. Patients characteristics.**

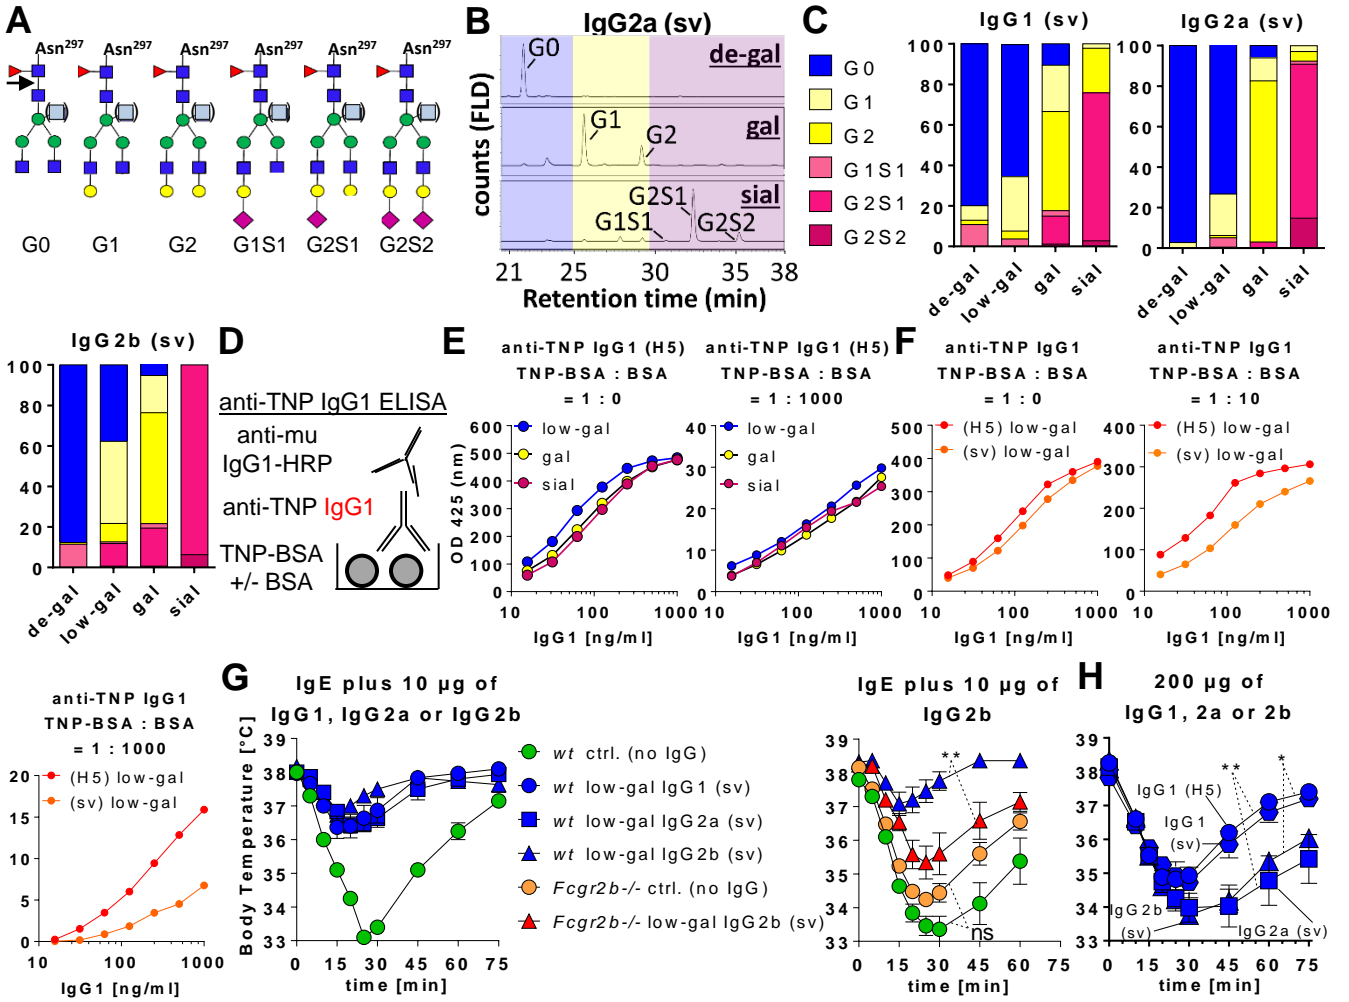

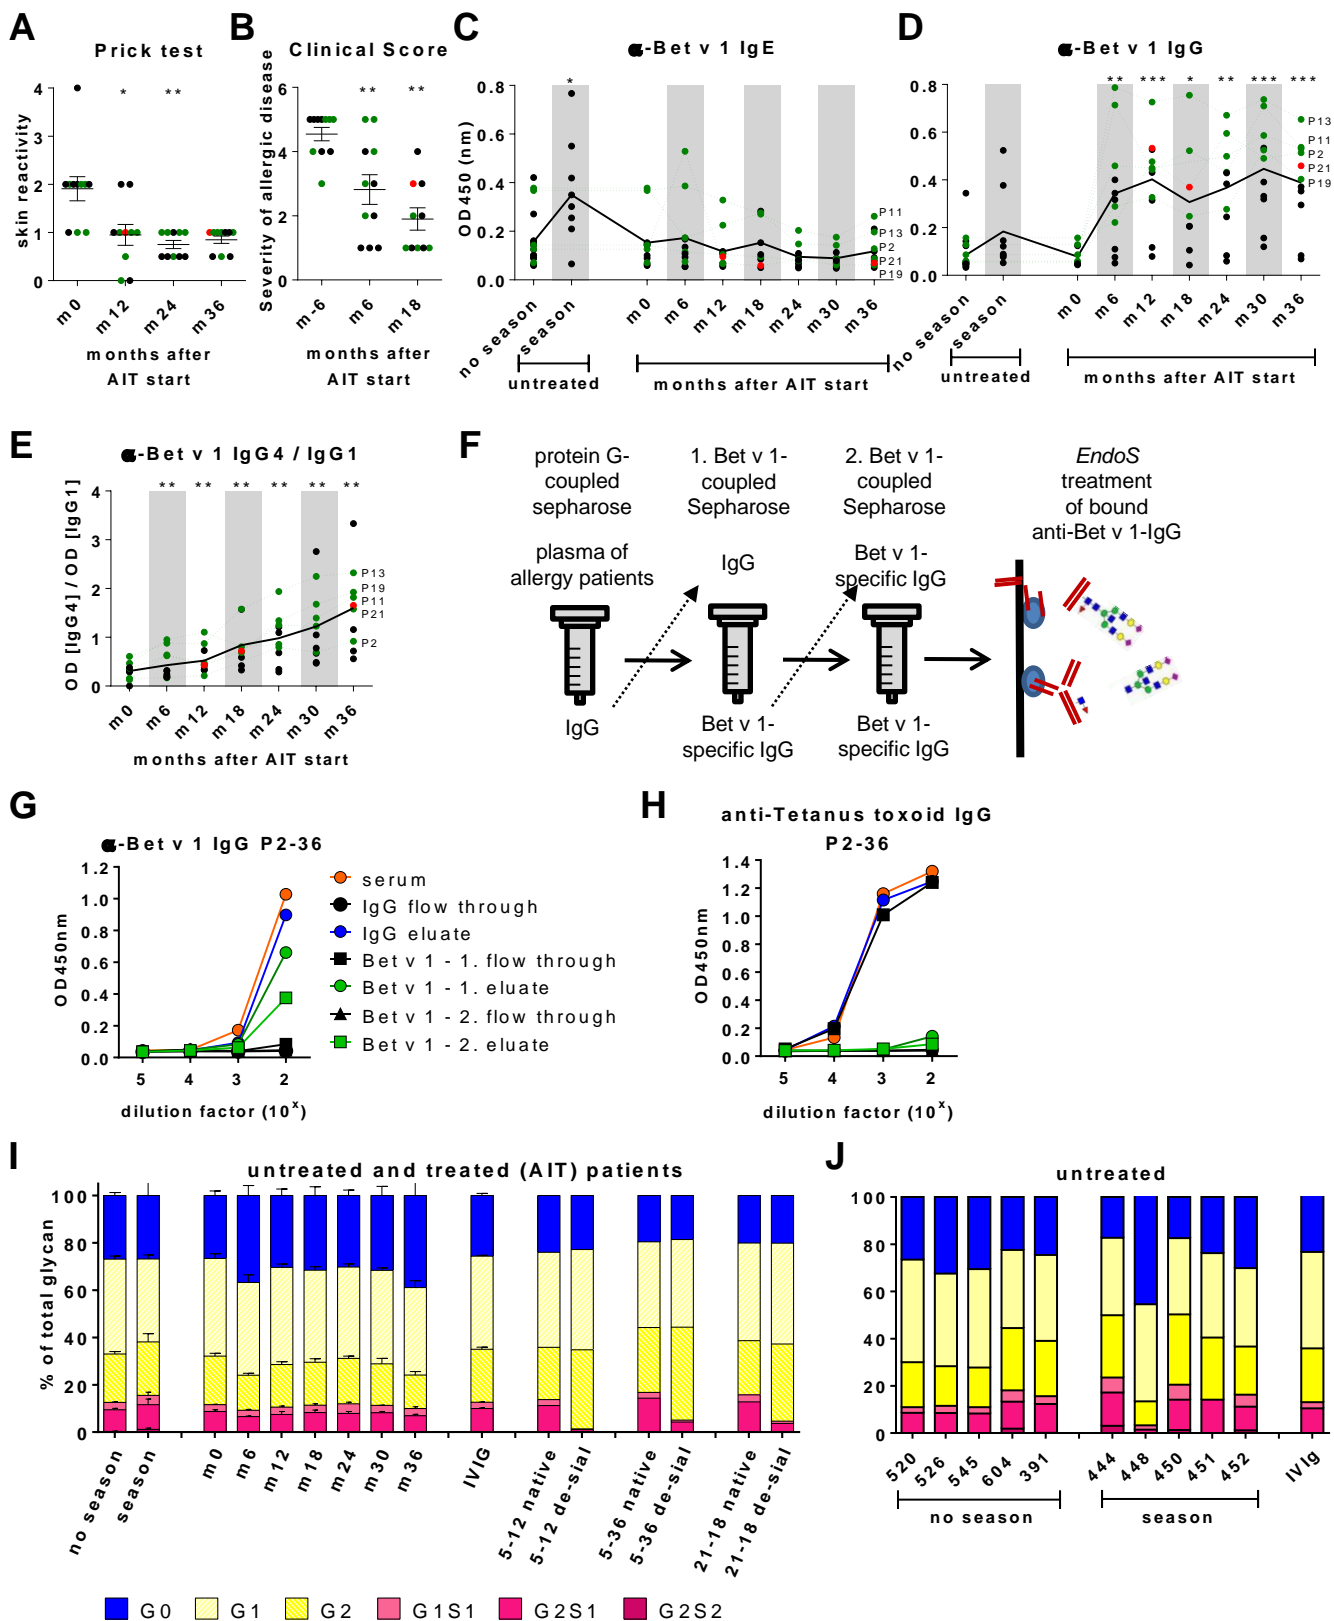

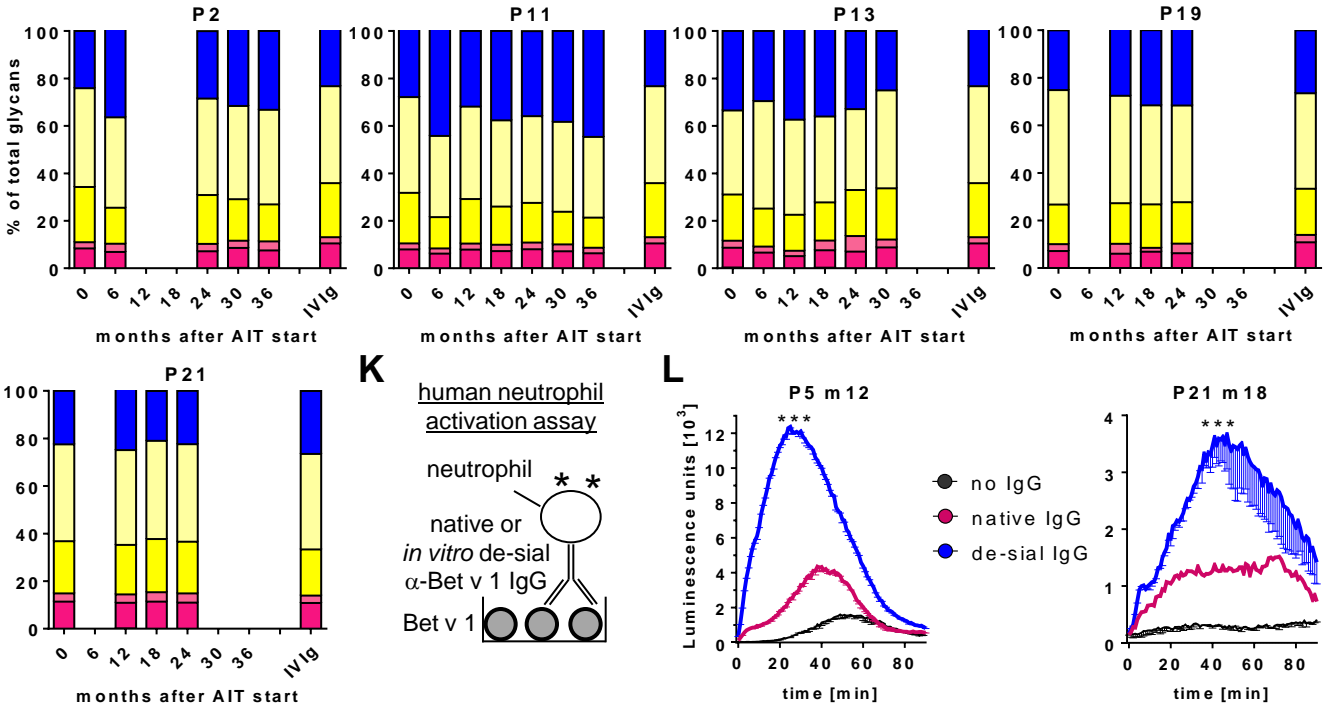

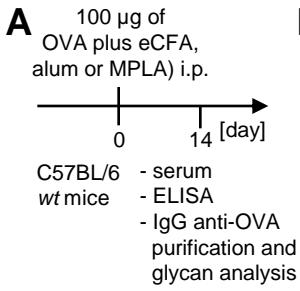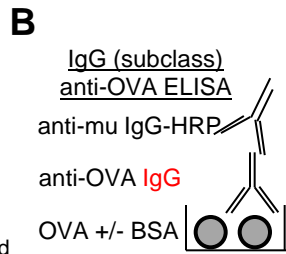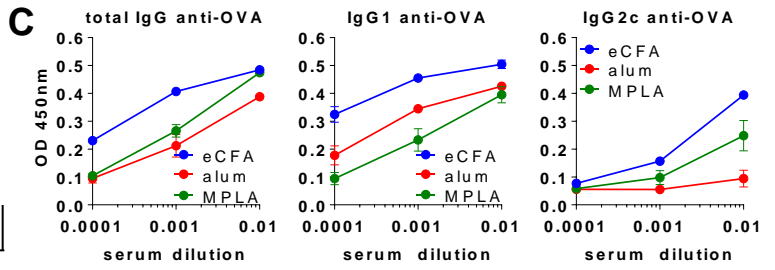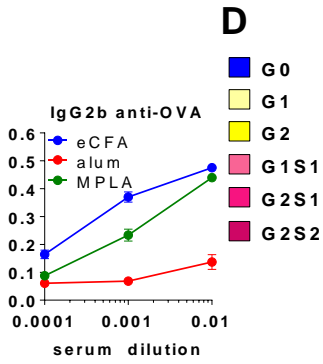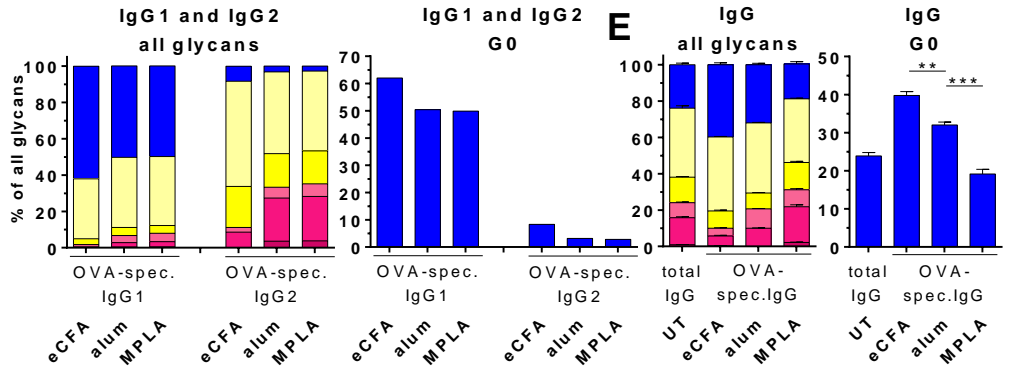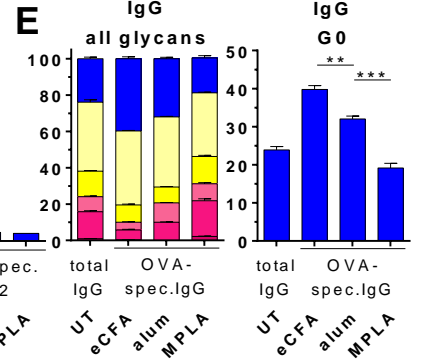

## Patients characteristics

|                                                                                                |      |        |
|------------------------------------------------------------------------------------------------|------|--------|
| <b>treated patients</b>                                                                        |      |        |
|                                                                                                | n=11 | Range  |
| sex (male/female)                                                                              | 4/7  |        |
| age (average)                                                                                  | 41   | 21-61  |
|                                                                                                |      |        |
| total IgE (kUA/l) before start of treatment, no season (average)                               | 141  | 15-600 |
| IgE against birch pollen extract (kUA/l) before start of treatment, no season (average)        | 9    | 1-41   |
| IgE against Bet v 1 (kUA/l) before start of treatment, no season (average)                     | 9    | 1-43   |
|                                                                                                |      |        |
|                                                                                                |      |        |
| <b>untreated patients, no season</b>                                                           |      |        |
|                                                                                                | n=8  | Range  |
| sex (m/w)                                                                                      | 3/5  |        |
| age (average)                                                                                  | 40   | 17-63  |
|                                                                                                |      |        |
| total IgE (kU/l) (average)                                                                     | 216  | 41-539 |
| IgE against birch pollen extract (kU/l) (average)*                                             | 13   | 0-41   |
| IgE against rBet v 1 (kU/l) (average)*                                                         | 13   | 0-42   |
|                                                                                                |      |        |
|                                                                                                |      |        |
| <b>untreated patients, season</b>                                                              |      |        |
|                                                                                                | n=8  | Range  |
| sex (m/w)                                                                                      | 1/7  |        |
| age (average)                                                                                  | 45   | 30-56  |
|                                                                                                |      |        |
| total IgE (kU/l) (average)                                                                     | 141  | 23-269 |
| IgE against birch pollen extract (kU/l) (average)#                                             | 30   | 0-100  |
| IgE against rBet v 1 (kU/l) (average)#                                                         | 33   | 0-100  |
|                                                                                                |      |        |
| *.# one patient negative for birch pollen- and Bet v 1-specific IgE showed positive prick test |      |        |
